# Supplementary material for: Simultaneous Determination of Multiple Components in Guanjiekang in Rat Plasma via the UPLC–MS/MS Method and Its Application in Pharmacokinetic Study
Source: MDPI journal article supplement (doi:10.3390/molecules21121732), 2016-12-16
Supplement: s1 [file s1]

# Supplementary Materials: Simultaneous Determination of Multiple Components in Guanjiakang in Rat Plasma via the UPLC–MS/MS Method and Its Application in Pharmacokinetic Study

Jian Wu, Ying Xie, Zheng Xiang, CanJian Wang, Hua Zhou and Liang Liu

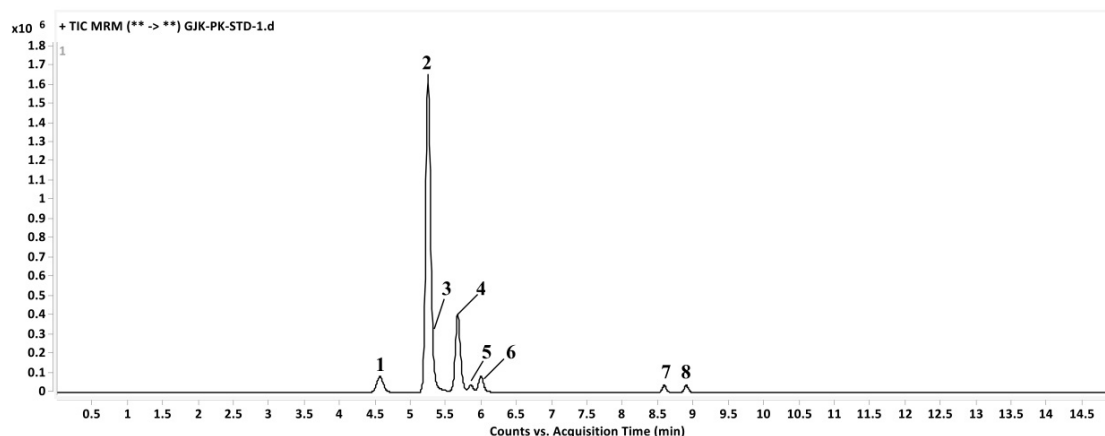

**Figure S1.** The chromatogram of stock solution. (1: Paeoniflorin, 2: Tetrahydropalmatine, 3: Benzoylmesaconine, 4: Calycosin-7-glucoside, 5: Benzoylhypaconine, 6: Isoliquiritigenin, 7: Naringin, 8: Formononetin).

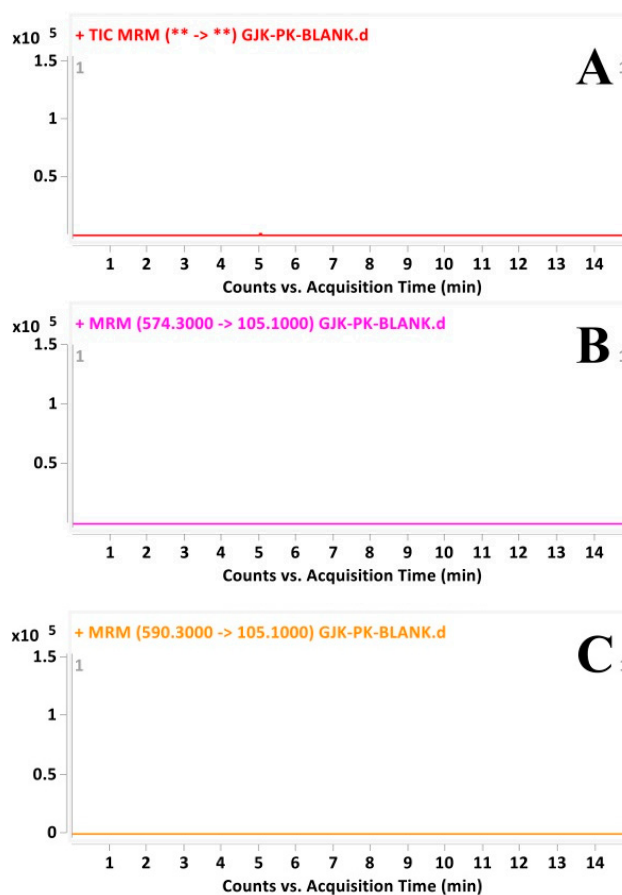

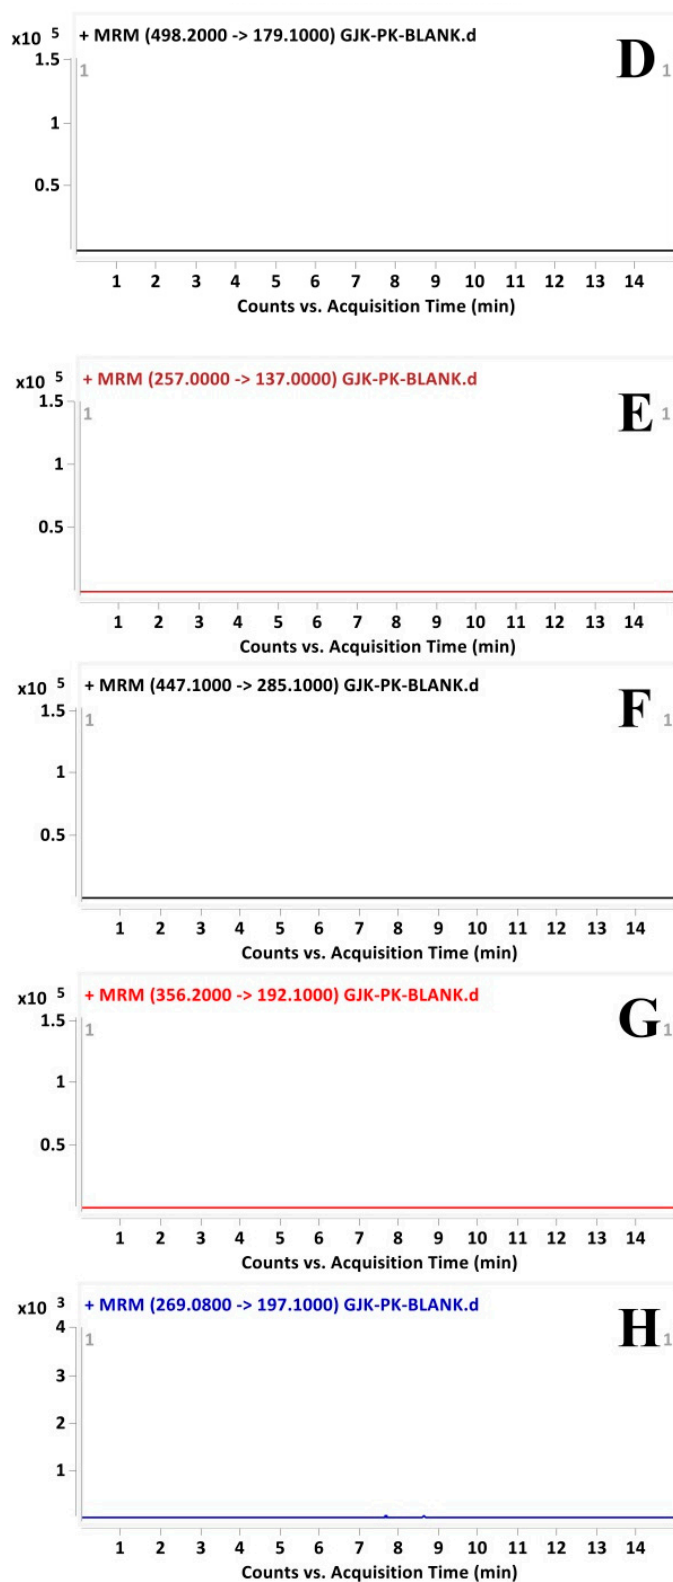

**Figure S2.** The chromatogram of rat blank plasma. ((A): blank of rat plasma; (B): determination of benzoylmesaconine in blank plasma; (C): determination of benzoylhypaconine in blank plasma; (D): determination of paeoniflorin in blank plasma; (E): determination of isoliquiritigenin in blank plasma; (F): determination of calycosin-7-glucoside in blank plasma; (G): determination of tetrahydropalmatine in blank plasma; (H): determination of formononetin in blank plasma).
